# Supplementary material for: The Preoperative Peripheral Blood Monocyte Count Is Associated with Liver Metastasis and Overall Survival in Colorectal Cancer Patients
Source: PubMed Central journal article supplement (PMC4927165; doi:10.1371/journal.pone.0157486), 2016-06-29
Supplement: pone.0157486.s002.pdf [file pone.0157486.s002.pdf]

| bianhao | Gender | Age | Site | Different | Diameter | T   | N | M |   |
|---------|--------|-----|------|-----------|----------|-----|---|---|---|
| 1       |        | 2   | 83   | 1         | 2        | 11  | 4 | 0 | 0 |
| 2       |        | 1   | 71   | 2         | 3        | 8   | 4 | 1 | 0 |
| 3       |        | 1   | 72   | 2         | 2        | 3   | 4 | 1 | 1 |
| 4       |        | 1   | 77   | 1         | 3        | 4.5 | 3 | 1 | 0 |
| 5       |        | 2   | 76   | 1         | 2        | 2   | 3 | 0 | 0 |
| 6       |        | 1   | 75   | 2         | 1        | 3   | 2 | 1 | 0 |
| 7       |        | 1   | 56   | 2         | 2        | 1.5 | 4 | 0 | 0 |
| 8       |        | 2   | 61   | 1         | 1        | 2.5 | 4 | 0 | 0 |
| 9       |        | 1   | 58   | 1         | 2        | 5   | 3 | 0 | 0 |
| 10      |        | 1   | 78   | 1         | 3        | 3.5 | 3 | 0 | 0 |
| 11      |        | 1   | 72   | 1         | 2        | 5   | 3 | 1 | 0 |
| 12      |        | 2   | 77   | 1         | 2        | 3.5 | 3 | 0 | 1 |
| 13      |        | 2   | 45   | 1         | 1        | 8   | 4 | 2 | 0 |
| 14      |        | 1   | 44   | 2         | 2        | 5   | 2 | 0 | 0 |
| 15      |        | 1   | 55   | 1         | 3        | 5   | 3 | 0 | 0 |
| 16      |        | 2   | 51   | 2         | 2        | 3.5 | 2 | 0 | 0 |
| 17      |        | 2   | 68   | 2         | 2        | 4   | 3 | 1 | 0 |
| 18      |        | 2   | 42   | 1         | 3        | 11  | 4 | 2 | 0 |
| 19      |        | 1   | 68   | 1         | 2        | 10  | 3 | 0 | 0 |
| 20      |        | 2   | 46   | 2         | 2        | 3.5 | 3 | 0 | 0 |
| 21      |        | 2   | 51   | 2         | 2        | 3.5 | 3 | 0 | 0 |
| 22      |        | 2   | 80   | 2         | 1        | 4.5 | 3 | 2 | 0 |
| 23      |        | 2   | 49   | 1         | 3        | 4.5 | 4 | 1 | 0 |
| 24      |        | 1   | 43   | 2         | 1        | 4   | 4 | 0 | 0 |
| 25      |        | 2   | 72   | 2         | 2        | 5   | 3 | 1 | 0 |
| 26      |        | 1   | 54   | 2         | 1        | 4   | 3 | 1 | 0 |
| 27      |        | 1   | 54   | 2         | 2        | 5.5 | 3 | 1 | 0 |
| 28      |        | 1   | 54   | 2         | 2        | 3   | 1 | 1 | 0 |
| 29      |        | 1   | 60   | 1         | 3        | 18  | 4 | 1 | 0 |
| 30      |        | 1   | 46   | 1         | 2        | 6   | 3 | 0 | 0 |
| 31      |        | 1   | 60   | 2         | 1        | 5   | 3 | 0 | 0 |
| 32      |        | 1   | 60   | 1         | 3        | 5.5 | 3 | 1 | 0 |
| 33      |        | 2   | 53   | 2         | 2        | 4   | 2 | 1 | 0 |
| 34      |        | 2   | 42   | 1         | 2        | 2   | 3 | 0 | 0 |
| 35      |        | 1   | 53   | 2         | 2        | 7   | 3 | 0 | 0 |
| 36      |        | 2   | 44   | 1         | 2        | 3.5 | 3 | 2 | 0 |
| 37      |        | 1   | 57   | 1         | 3        | 7   | 4 | 2 | 0 |
| 38      |        | 1   | 34   | 2         | 1        | 2.5 | 3 | 1 | 0 |
| 39      |        | 1   | 53   | 2         | 2        | 3   | 3 | 2 | 0 |
| 40      |        | 1   | 39   | 2         | 2        | 6.5 | 3 | 0 | 0 |
| 41      |        | 1   | 32   | 1         | 3        | 10  | 4 | 0 | 0 |
| 42      |        | 2   | 66   | 2         | 2        | 5   | 3 | 2 | 0 |
| 43      |        | 2   | 54   | 2         | 1        | 7   | 3 | 1 | 0 |
| 44      |        | 1   | 69   | 1         | 2        | 3   | 3 | 1 | 0 |
| 45      |        | 1   | 33   | 2         | 3        | 6   | 4 | 0 | 0 |
| 46      |        | 1   | 64   | 2         | 1        | 6   | 3 | 0 | 0 |
| 47      |        | 2   | 49   | 2         | 2        | 3   | 4 | 0 | 0 |
| 48      |        | 1   | 32   | 1         | 2        | 7   | 3 | 0 | 0 |
| 49      |        | 2   | 62   | 1         | 1        | 5.5 | 3 | 0 | 0 |
| 50      |        | 2   | 61   | 1         | 2        | 1.6 | 3 | 0 | 0 |
| 51      |        | 2   | 47   | 1         | 1        | 2.5 | 2 | 2 | 1 |
| 52      |        | 1   | 45   | 1         | 3        | 8   | 4 | 0 | 0 |
| 53      |        | 1   | 52   | 2         | 2        | 4   | 3 | 0 | 0 |

|     |   |    |   |   |     |   |   |   |
|-----|---|----|---|---|-----|---|---|---|
| 54  | 2 | 51 | 2 | 2 | 5   | 3 | 0 | 0 |
| 55  | 2 | 52 | 1 | 2 | 2.5 | 3 | 0 | 0 |
| 56  | 2 | 67 | 2 | 2 | 3.5 | 2 | 0 | 0 |
| 57  | 1 | 63 | 1 | 2 | 6   | 3 | 0 | 0 |
| 58  | 1 | 62 | 2 | 2 | 5   | 3 | 1 | 0 |
| 59  | 1 | 64 | 1 | 3 | 6.5 | 4 | 0 | 0 |
| 60  | 1 | 53 | 2 | 2 | 2.5 | 2 | 0 | 0 |
| 61  | 1 | 59 | 1 | 2 | 12  | 3 | 1 | 0 |
| 62  | 1 | 56 | 2 | 3 | 3.5 | 3 | 0 | 0 |
| 63  | 1 | 32 | 2 | 2 | 3.5 | 4 | 2 | 0 |
| 64  | 2 | 69 | 1 | 3 | 7   | 4 | 0 | 0 |
| 65  | 2 | 57 | 2 | 2 | 3.5 | 3 | 2 | 1 |
| 66  | 1 | 78 | 1 | 3 | 4   | 3 | 2 | 0 |
| 67  | 2 | 57 | 1 | 3 | 5   | 4 | 2 | 0 |
| 68  | 1 | 53 | 1 | 2 | 3   | 3 | 0 | 1 |
| 69  | 1 | 43 | 1 | 2 | 5   | 3 | 0 | 0 |
| 70  | 1 | 55 | 1 | 2 | 5   | 3 | 1 | 0 |
| 71  | 1 | 40 | 1 | 2 | 10  | 4 | 0 | 0 |
| 72  | 1 | 48 | 2 | 2 | 5   | 4 | 0 | 0 |
| 73  | 1 | 55 | 1 | 1 | 5   | 3 | 0 | 0 |
| 74  | 1 | 73 | 2 | 2 | 4   | 3 | 2 | 0 |
| 75  | 1 | 60 | 1 | 2 | 6   | 4 | 0 | 0 |
| 76  | 1 | 65 | 1 | 1 | 4   | 4 | 0 | 1 |
| 77  | 2 | 49 | 1 | 1 | 5   | 2 | 0 | 0 |
| 78  | 1 | 45 | 1 | 3 | 8   | 4 | 2 | 0 |
| 79  | 1 | 43 | 1 | 3 | 4   | 4 | 1 | 0 |
| 80  | 1 | 36 | 2 | 1 | 3   | 1 | 0 | 0 |
| 81  | 1 | 30 | 1 | 2 | 3   | 4 | 1 | 1 |
| 82  | 1 | 39 | 1 | 1 | 5   | 2 | 0 | 0 |
| 83  | 2 | 47 | 1 | 2 | 4   | 3 | 1 | 0 |
| 84  | 2 | 70 | 1 | 2 | 6   | 4 | 2 | 1 |
| 85  | 1 | 38 | 1 | 3 | 8   | 3 | 0 | 0 |
| 86  | 1 | 51 | 1 | 2 | 5   | 4 | 0 | 0 |
| 87  | 1 | 68 | 1 | 2 | 5   | 3 | 2 | 1 |
| 88  | 1 | 58 | 2 | 2 | 8   | 3 | 0 | 0 |
| 89  | 1 | 45 | 1 | 2 | 3   | 3 | 1 | 1 |
| 90  | 1 | 55 | 2 | 3 | 3   | 2 | 1 | 0 |
| 91  | 1 | 53 | 2 | 2 | 3   | 2 | 0 | 0 |
| 92  | 2 | 24 | 1 | 3 | 5   | 3 | 1 | 0 |
| 93  | 2 | 74 | 1 | 3 | 5.5 | 3 | 0 | 0 |
| 94  | 1 | 44 | 1 | 1 | 2.5 | 4 | 1 | 1 |
| 95  | 1 | 56 | 1 | 3 | 5   | 3 | 0 | 0 |
| 96  | 1 | 81 | 1 | 2 | 5   | 3 | 1 | 1 |
| 97  | 1 | 36 | 1 | 3 | 7   | 4 | 0 | 0 |
| 98  | 1 | 34 | 1 | 3 | 3.5 | 3 | 0 | 0 |
| 99  | 1 | 51 | 2 | 2 | 5   | 3 | 0 | 0 |
| 100 | 2 | 43 | 1 | 3 | 6   | 3 | 0 | 1 |
| 101 | 1 | 54 | 1 | 3 | 4   | 4 | 2 | 1 |
| 102 | 1 | 76 | 2 | 2 | 10  | 3 | 1 | 0 |
| 103 | 1 | 46 | 2 | 2 | 2   | 2 | 0 | 0 |
| 104 | 1 | 66 | 1 | 3 | 5   | 4 | 0 | 0 |
| 105 | 1 | 61 | 2 | 3 | 2   | 3 | 1 | 1 |
| 106 | 1 | 59 | 2 | 2 | 5   | 3 | 0 | 0 |
| 107 | 1 | 56 | 2 | 2 | 5.5 | 3 | 1 | 0 |

|     |   |    |   |   |     |   |   |   |
|-----|---|----|---|---|-----|---|---|---|
| 108 | 2 | 45 | 2 | 2 | 1   | 2 | 0 | 0 |
| 109 | 1 | 53 | 2 | 2 | 4.5 | 3 | 1 | 0 |
| 110 | 1 | 46 | 2 | 2 | 4   | 3 | 1 | 0 |
| 111 | 2 | 32 | 2 | 3 | 5   | 3 | 0 | 0 |
| 112 | 2 | 73 | 2 | 2 | 6   | 4 | 1 | 0 |
| 113 | 1 | 55 | 2 | 2 | 5.5 | 4 | 0 | 0 |
| 114 | 2 | 66 | 1 | 2 | 4   | 4 | 2 | 0 |
| 115 | 1 | 63 | 2 | 2 | 5   | 2 | 0 | 0 |
| 116 | 1 | 56 | 1 | 3 | 10  | 3 | 1 | 0 |
| 117 | 1 | 53 | 2 | 2 | 8.5 | 4 | 0 | 0 |
| 118 | 1 | 70 | 1 | 2 | 4.5 | 4 | 2 | 1 |
| 119 | 1 | 58 | 2 | 3 | 2   | 3 | 0 | 0 |
| 120 | 1 | 53 | 2 | 2 | 4.5 | 3 | 0 | 0 |
| 121 | 2 | 75 | 2 | 3 | 3.5 | 3 | 1 | 0 |
| 122 | 2 | 60 | 2 | 2 | 4   | 3 | 0 | 0 |
| 123 | 1 | 38 | 2 | 1 | 2.5 | 4 | 0 | 0 |
| 124 | 1 | 68 | 2 | 2 | 5   | 3 | 1 | 0 |
| 125 | 2 | 43 | 1 | 3 | 4.5 | 4 | 2 | 0 |
| 126 | 2 | 59 | 1 | 2 | 3   | 3 | 1 | 0 |
| 127 | 1 | 64 | 1 | 2 | 5   | 4 | 2 | 1 |
| 128 | 1 | 51 | 1 | 2 | 4   | 4 | 1 | 1 |
| 129 | 2 | 64 | 1 | 2 | 6   | 3 | 1 | 0 |
| 130 | 1 | 44 | 2 | 2 | 3   | 2 | 0 | 0 |
| 131 | 1 | 46 | 2 | 3 | 4   | 3 | 2 | 0 |
| 132 | 1 | 55 | 1 | 3 | 3   | 3 | 1 | 0 |
| 133 | 2 | 53 | 2 | 2 | 2   | 2 | 0 | 0 |
| 134 | 1 | 63 | 2 | 2 | 8   | 3 | 0 | 0 |
| 135 | 2 | 47 | 2 | 2 | 3.5 | 2 | 2 | 0 |
| 136 | 2 | 60 | 2 | 2 | 9   | 3 | 0 | 0 |
| 137 | 2 | 68 | 1 | 3 | 3   | 4 | 1 | 0 |
| 138 | 1 | 77 | 2 | 2 | 4.8 | 3 | 1 | 0 |
| 139 | 2 | 65 | 2 | 2 | 3.8 | 4 | 0 | 0 |
| 140 | 1 | 59 | 2 | 2 | 3   | 3 | 0 | 0 |
| 141 | 1 | 64 | 1 | 2 | 2.2 | 2 | 2 | 0 |
| 142 | 2 | 87 | 1 | 2 | 7   | 3 | 0 | 0 |
| 143 | 1 | 55 | 2 | 2 | 6   | 3 | 1 | 0 |
| 144 | 2 | 42 | 2 | 1 | 4.5 | 3 | 1 | 0 |
| 145 | 1 | 46 | 2 | 2 | 3   | 2 | 0 | 0 |
| 146 | 2 | 38 | 2 | 3 | 3.5 | 4 | 2 | 0 |
| 147 | 1 | 57 | 2 | 2 | 6   | 3 | 0 | 0 |
| 148 | 1 | 41 | 1 | 2 | 4.5 | 3 | 1 | 0 |
| 149 | 1 | 51 | 2 | 1 | 0.8 | 2 | 0 | 0 |
| 150 | 1 | 41 | 1 | 2 | 8   | 3 | 0 | 0 |
| 151 | 2 | 76 | 2 | 2 | 5   | 4 | 1 | 0 |
| 152 | 2 | 57 | 1 | 2 | 5   | 3 | 0 | 1 |
| 153 | 1 | 72 | 1 | 1 | 5   | 3 | 0 | 0 |
| 154 | 1 | 30 | 1 | 2 | 5.5 | 4 | 0 | 0 |
| 155 | 1 | 54 | 2 | 3 | 4.5 | 3 | 2 | 0 |
| 156 | 1 | 56 | 1 | 2 | 3   | 2 | 0 | 0 |
| 157 | 2 | 58 | 1 | 3 | 2.7 | 4 | 2 | 0 |
| 158 | 2 | 49 | 2 | 2 | 2   | 2 | 0 | 0 |
| 159 | 2 | 51 | 1 | 2 | 5.5 | 4 | 2 | 1 |
| 160 | 2 | 68 | 1 | 3 | 7.2 | 4 | 1 | 0 |
| 161 | 1 | 52 | 2 | 2 | 3.5 | 3 | 2 | 0 |

|     |   |    |   |   |     |   |   |   |
|-----|---|----|---|---|-----|---|---|---|
| 162 | 2 | 39 | 1 | 1 | 3.5 | 3 | 1 | 0 |
| 163 | 1 | 45 | 1 | 1 | 10  | 3 | 0 | 1 |
| 164 | 1 | 70 | 2 | 3 | 5   | 4 | 1 | 0 |
| 165 | 1 | 54 | 1 | 2 | 4   | 4 | 1 | 1 |
| 166 | 1 | 47 | 1 | 3 | 1   | 1 | 0 | 0 |
| 167 | 1 | 46 | 2 | 2 | 3.5 | 3 | 0 | 0 |
| 168 | 1 | 74 | 1 | 2 | 3   | 2 | 0 | 0 |
| 169 | 1 | 53 | 2 | 1 | 4   | 1 | 1 | 0 |
| 170 | 1 | 72 | 1 | 2 | 2.2 | 3 | 0 | 0 |
| 171 | 2 | 76 | 1 | 2 | 4.5 | 3 | 0 | 0 |
| 172 | 1 | 81 | 1 | 3 | 4   | 4 | 2 | 1 |
| 173 | 1 | 64 | 2 | 3 | 5   | 2 | 0 | 0 |
| 174 | 1 | 57 | 2 | 2 | 4   | 3 | 1 | 0 |
| 175 | 2 | 60 | 1 | 3 | 6.4 | 3 | 1 | 0 |
| 176 | 1 | 56 | 1 | 2 | 5   | 4 | 0 | 1 |
| 177 | 1 | 44 | 1 | 2 | 4   | 4 | 2 | 0 |
| 178 | 1 | 59 | 2 | 2 | 5.5 | 3 | 2 | 0 |
| 179 | 2 | 43 | 2 | 3 | 4.5 | 4 | 0 | 0 |
| 180 | 1 | 50 | 2 | 1 | 5   | 4 | 1 | 0 |
| 181 | 1 | 48 | 1 | 1 | 7   | 4 | 2 | 1 |
| 182 | 1 | 51 | 1 | 2 | 3.5 | 4 | 2 | 1 |
| 183 | 2 | 63 | 1 | 2 | 2.5 | 3 | 0 | 0 |
| 184 | 2 | 39 | 1 | 2 | 4   | 4 | 0 | 0 |
| 185 | 2 | 58 | 1 | 3 | 4   | 3 | 1 | 0 |
| 186 | 2 | 53 | 1 | 2 | 2   | 3 | 0 | 0 |
| 187 | 2 | 44 | 2 | 3 | 5   | 4 | 2 | 0 |
| 188 | 1 | 64 | 1 | 3 | 7   | 4 | 0 | 0 |
| 189 | 1 | 48 | 2 | 2 | 4   | 3 | 0 | 0 |
| 190 | 2 | 66 | 1 | 2 | 1.5 | 2 | 0 | 1 |
| 191 | 1 | 32 | 2 | 3 | 2.2 | 2 | 0 | 0 |
| 192 | 1 | 51 | 2 | 2 | 2.5 | 3 | 0 | 0 |
| 193 | 1 | 77 | 1 | 2 | 5   | 4 | 2 | 1 |
| 194 | 2 | 51 | 2 | 2 | 5   | 3 | 1 | 1 |
| 195 | 1 | 58 | 1 | 3 | 5   | 4 | 2 | 1 |
| 196 | 1 | 30 | 1 | 2 | 11  | 4 | 0 | 0 |
| 197 | 2 | 42 | 1 | 2 | 3.3 | 4 | 0 | 0 |
| 198 | 2 | 67 | 1 | 3 | 3   | 4 | 1 | 1 |
| 199 | 1 | 58 | 1 | 2 | 12  | 4 | 1 | 0 |
| 200 | 2 | 81 | 1 | 3 | 7   | 4 | 1 | 1 |
| 201 | 2 | 59 | 1 | 3 | 8   | 4 | 1 | 1 |
| 202 | 2 | 48 | 1 | 2 | 5.5 | 4 | 0 | 0 |
| 203 | 1 | 81 | 1 | 3 | 6   | 4 | 2 | 0 |
| 204 | 1 | 83 | 1 | 2 | 6   | 3 | 1 | 0 |
| 205 | 1 | 79 | 2 | 3 | 6.4 | 4 | 2 | 0 |
| 206 | 1 | 69 | 1 | 2 | 5   | 4 | 0 | 0 |
| 207 | 1 | 62 | 1 | 2 | 4   | 4 | 0 | 0 |
| 208 | 1 | 74 | 1 | 2 | 5.5 | 4 | 2 | 0 |
| 209 | 1 | 74 | 1 | 2 | 2.5 | 3 | 0 | 0 |
| 210 | 1 | 56 | 1 | 3 | 4   | 4 | 0 | 0 |

| Stage | Monocyte OS |      | state |
|-------|-------------|------|-------|
| 2     | 0.021       |      |       |
| 3     | 0.064       | 52.2 | 1     |
| 4     | 0.089       | 45.7 | 1     |
| 3     | 0.043       | 46.1 | 0     |
| 2     | 0.045       |      |       |
| 3     | 0.032       | 55.3 | 0     |
| 2     | 0.049       | 14.9 | 0     |
| 2     | 0.069       | 24.7 | 0     |
| 2     | 0.057       | 36   | 0     |
| 2     | 0.039       |      |       |
| 3     | 0.051       | 60.5 | 0     |
| 4     | 0.082       | 23.2 | 0     |
| 3     | 0.021       | 25.1 | 1     |
| 1     | 0.05        | 84.3 | 0     |
| 2     | 0.042       | 74.4 | 0     |
| 1     | 0.042       | 85.1 | 0     |
| 3     | 0.04        | 12.4 | 0     |
| 3     | 0.023       | 30.2 | 1     |
| 2     | 0.043       | 62.2 | 0     |
| 2     | 0.036       | 36   | 0     |
| 2     | 0.038       | 43.7 | 0     |
| 3     | 0.052       |      |       |
| 3     | 0.048       |      |       |
| 2     | 0.046       | 8.6  | 1     |
| 3     | 0.021       |      |       |
| 3     | 0.05        | 43.5 | 0     |
| 3     | 0.044       | 42.6 | 0     |
| 1     | 0.06        | 84.7 | 0     |
| 3     | 0.03        | 8    | 1     |
| 2     | 0.045       | 83.4 | 0     |
| 2     | 0.047       | 79.5 | 0     |
| 3     | 0.035       | 66.6 | 0     |
| 3     | 0.054       | 66.6 | 0     |
| 2     | 0.056       | 81.2 | 0     |
| 2     | 0.029       | 70.8 | 0     |
| 3     | 0.041       | 28.4 | 1     |
| 3     | 0.068       | 5.1  | 1     |
| 3     | 0.026       | 63.3 | 0     |
| 3     | 0.049       | 56.6 | 0     |
| 2     | 0.034       | 48   | 0     |
| 2     | 0.073       | 8.2  | 1     |
| 3     | 0.031       | 11   | 0     |
| 3     | 0.055       | 37   | 1     |
| 3     | 0.074       | 35.3 | 0     |
| 2     | 0.073       |      |       |
| 2     | 0.02        | 38.6 | 0     |
| 2     | 0.04        | 16.8 | 1     |
| 2     | 0.047       | 78.9 | 0     |
| 2     | 0.038       | 67   | 0     |
| 2     | 0.038       | 22.8 | 0     |
| 4     | 0.078       | 20.7 | 1     |
| 2     | 0.046       | 43.5 | 0     |
| 2     | 0.048       | 72.5 | 0     |

|   |       |      |   |
|---|-------|------|---|
| 2 | 0.049 | 28.6 | 0 |
| 2 | 0.043 | 24   | 0 |
| 1 | 0.049 |      |   |
| 2 | 0.049 | 69.2 | 0 |
| 3 | 0.133 | 58.9 | 0 |
| 2 | 0.063 | 67.3 | 0 |
| 1 | 0.079 | 67.4 | 0 |
| 3 | 0.061 | 14.8 | 1 |
| 2 | 0.044 | 51.8 | 1 |
| 3 | 0.061 | 64.8 | 0 |
| 2 | 0.052 | 12   | 0 |
| 4 | 0.096 | 20.1 | 1 |
| 3 | 0.044 | 21.2 | 1 |
| 3 | 0.045 | 19.4 | 1 |
| 4 | 0.07  | 36.3 | 1 |
| 2 | 0.048 | 64.6 | 0 |
| 3 | 0.05  | 66.8 | 0 |
| 2 | 0.03  | 12   | 0 |
| 2 | 0.039 | 59.1 | 0 |
| 2 | 0.056 | 62.6 | 0 |
| 3 | 0.079 | 12   | 0 |
| 2 | 0.069 | 84   | 1 |
| 4 | 0.052 | 26   | 1 |
| 1 | 0.036 | 64.5 | 0 |
| 3 | 0.064 | 21.5 | 1 |
| 3 | 0.035 | 13   | 1 |
| 1 | 0.048 | 57.3 | 0 |
| 4 | 0.094 | 19.6 | 0 |
| 1 | 0.058 | 64.1 | 0 |
| 3 | 0.058 | 64.3 | 0 |
| 4 | 0.078 | 32   | 1 |
| 2 | 0.032 | 31.3 | 0 |
| 2 | 0.027 | 53.3 | 0 |
| 4 | 0.089 | 36.1 | 1 |
| 2 | 0.063 | 58   | 0 |
| 4 | 0.071 | 15.9 | 1 |
| 3 | 0.029 | 56.2 | 0 |
| 1 | 0.055 | 56.9 | 0 |
| 3 | 0.033 | 53.3 | 0 |
| 2 | 0.044 | 52.6 | 0 |
| 4 | 0.096 |      |   |
| 2 | 0.037 | 53   | 0 |
| 4 | 0.1   | 48.2 | 0 |
| 2 | 0.036 | 22.3 | 1 |
| 2 | 0.044 | 53.3 | 0 |
| 2 | 0.033 | 43   | 0 |
| 4 | 0.054 | 13.6 | 1 |
| 4 | 0.069 | 10.9 | 1 |
| 3 | 0.07  | 44.5 | 0 |
| 1 | 0.061 | 0    |   |
| 2 | 0.03  | 47.4 | 0 |
| 4 | 0.085 | 3.1  | 1 |
| 2 | 0.048 | 42.1 | 0 |
| 3 | 0.038 | 43.5 | 0 |

|   |       |      |   |
|---|-------|------|---|
| 1 | 0.029 | 41.7 | 1 |
| 3 | 0.049 | 40.1 | 0 |
| 3 | 0.055 | 42   | 0 |
| 2 | 0.05  | 35   | 0 |
| 3 | 0.043 | 19.5 | 1 |
| 2 | 0.064 | 0    |   |
| 3 | 0.058 | 0    |   |
| 1 | 0.052 | 39.4 | 0 |
| 3 | 0.05  | 27   | 0 |
| 2 | 0.033 |      |   |
| 4 | 0.095 | 21   | 1 |
| 2 | 0.05  | 31.1 | 0 |
| 2 | 0.045 | 39   | 0 |
| 3 | 0.021 | 36.1 | 0 |
| 2 | 0.044 | 38.4 | 0 |
| 2 | 0.049 | 32.1 | 0 |
| 3 | 0.062 | 30.6 | 0 |
| 3 | 0.028 | 33.6 | 0 |
| 3 | 0.052 | 34.6 | 0 |
| 4 | 0.102 | 14.7 | 1 |
| 4 | 0.052 | 22.3 | 1 |
| 3 | 0.048 | 11.3 | 1 |
| 1 | 0.051 | 0    |   |
| 3 | 0.054 | 0    |   |
| 3 | 0.056 | 0    |   |
| 1 | 0.057 | 0    |   |
| 2 | 0.056 | 0    |   |
| 3 | 0.046 | 0    |   |
| 2 | 0.057 | 0    |   |
| 3 | 0.055 | 17.7 | 1 |
| 3 | 0.052 | 0    |   |
| 2 | 0.016 | 0    |   |
| 2 | 0.083 | 0    |   |
| 3 | 0.045 | 0    |   |
| 2 | 0.062 | 0    |   |
| 3 | 0.034 | 30.6 | 0 |
| 3 | 0.052 | 0    |   |
| 1 | 0.055 | 0    |   |
| 3 | 0.035 | 0    |   |
| 2 | 0.067 | 0    |   |
| 3 | 0.044 | 29.9 | 0 |
| 1 | 0.014 |      | 0 |
| 2 | 0.04  |      |   |
| 3 | 0.033 |      |   |
| 4 | 0.079 |      |   |
| 2 | 0.017 | 28.3 | 0 |
| 2 | 0.046 |      |   |
| 3 | 0.024 |      |   |
| 1 | 0.046 |      |   |
| 3 | 0.035 |      |   |
| 1 | 0.036 |      |   |
| 4 | 0.198 |      |   |
| 3 | 0.044 |      |   |
| 3 | 0.064 |      |   |

|   |       |      |   |
|---|-------|------|---|
| 3 | 0.027 | 12   | 0 |
| 4 | 0.092 |      |   |
| 3 | 0.053 |      |   |
| 4 | 0.084 | 22   | 1 |
| 1 | 0.054 |      |   |
| 2 | 0.037 |      |   |
| 1 | 0.05  |      |   |
| 3 | 0.034 | 28   | 0 |
| 2 | 0.046 |      |   |
| 2 | 0.049 |      |   |
| 4 | 0.06  | 8    | 1 |
| 1 | 0.051 | 19   | 0 |
| 3 | 0.065 | 20.5 | 0 |
| 3 | 0.041 | 16   | 0 |
| 4 | 0.068 | 20   | 0 |
| 3 | 0.06  | 20.4 | 0 |
| 3 | 0.08  | 28   | 0 |
| 2 | 0.032 | 15.6 | 0 |
| 3 | 0.061 | 15   | 0 |
| 4 | 0.064 | 11   | 1 |
| 4 | 0.11  | 15   | 1 |
| 2 | 0.037 | 15   | 0 |
| 2 | 0.043 | 16   | 0 |
| 3 | 0.031 | 17   | 0 |
| 2 | 0.054 | 12.5 | 0 |
| 3 | 0.062 | 14   | 0 |
| 2 | 0.05  | 14.1 | 0 |
| 2 | 0.067 | 13.3 | 0 |
| 4 | 0.105 | 13.3 | 0 |
| 1 | 0.046 | 11.6 | 0 |
| 2 | 0.048 | 11.9 | 0 |
| 4 | 0.056 | 84   | 1 |
| 4 | 0.066 | 12   | 0 |
| 4 | 0.037 | 10.1 | 1 |
| 3 | 0.051 | 84   | 1 |
| 3 | 0.042 | 67   | 1 |
| 4 | 0.052 | 48   | 1 |
| 3 | 0.053 | 40   | 1 |
| 4 | 0.071 | 38   | 1 |
| 4 | 0.036 | 36   | 1 |
| 3 | 0.071 | 24   | 1 |
| 3 | 0.059 | 24   | 1 |
| 3 | 0.041 | 25   | 1 |
| 3 | 0.051 | 22   | 1 |
| 3 | 0.052 | 24   | 1 |
| 3 | 0.046 | 24   | 1 |
| 3 | 0.052 | 17   | 1 |
| 3 | 0.053 | 13   | 1 |
| 3 | 0.067 | 11   | 1 |
